# Supplementary material for: Solvothermally induced α-Fe2O3/graphene nanocomposites with ultrahigh capacitance and excellent rate capability for supercapacitors
Source: Royal Society of Chemistry journal article supplement (doi:10.1039/c5ta06668a), 2015-01-01
Supplement: c5ta06668a1.pdf [file c5ta06668a1.pdf]

## Electronic Supplementary Information

### Solvothermal-induced $\alpha$ -Fe<sub>2</sub>O<sub>3</sub>/Graphene Nanocomposite with Ultrahigh Capacitance and Excellent Rate Capability for Supercapacitor

Hang Zhang, Qiuming Gao,\* Kai Yang, Yanli Tan, Weiqian Tian, Lihua Zhu, Zeyu Li, and Chunxiao Yang

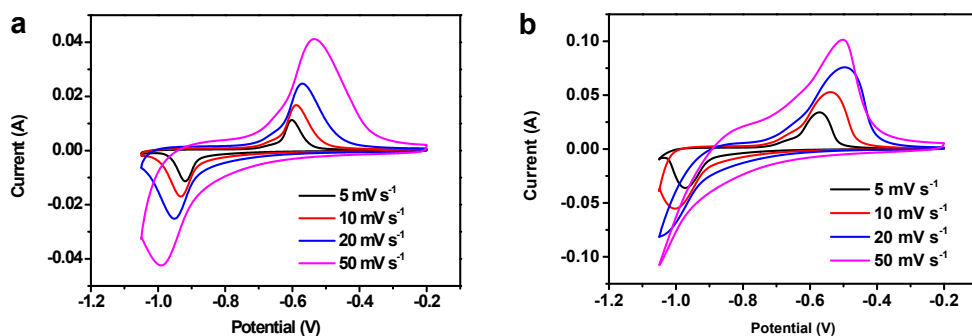

**Figure S1.** CV curves of the Fe<sub>2</sub>O<sub>3</sub>/GH-1 (a) and Fe<sub>2</sub>O<sub>3</sub>/GH-3 (b) composites at different scan rates.

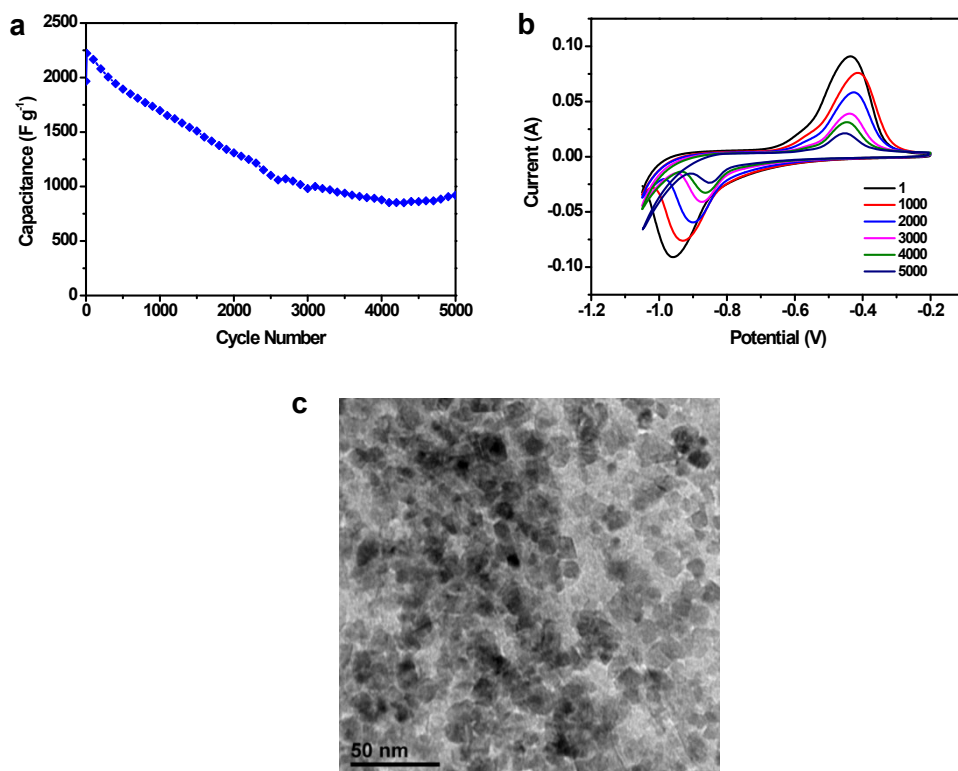

**Figure S2.** The specific capacitances (a) and the CV curves (b) of Fe<sub>2</sub>O<sub>3</sub>/GH-2 sample at 20 mV s<sup>-1</sup> for 5000 cycles. The capacitance retention was 46.8% (920 F g<sup>-1</sup>). And TEM image (c) of Fe<sub>2</sub>O<sub>3</sub>/GH-2 sample after 5000 cycles, showing the partially damaged and aggregated Fe<sub>2</sub>O<sub>3</sub> particles.

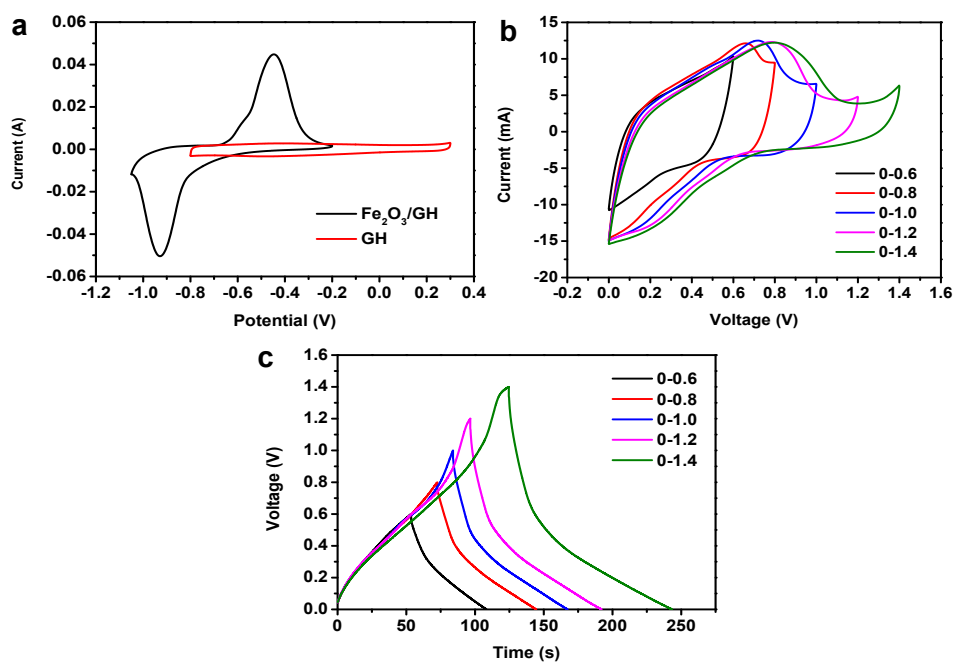

**Figure S3.** CV curves (a) of the  $\text{Fe}_2\text{O}_3/\text{GH}$ -2 composite and GH samples at  $20 \text{ mV s}^{-1}$  as well as CV curves (b) and galvanostatic charge-discharge curves (c) of the  $\text{Fe}_2\text{O}_3/\text{GH}/\text{GH}$  ASCs under different voltage windows.

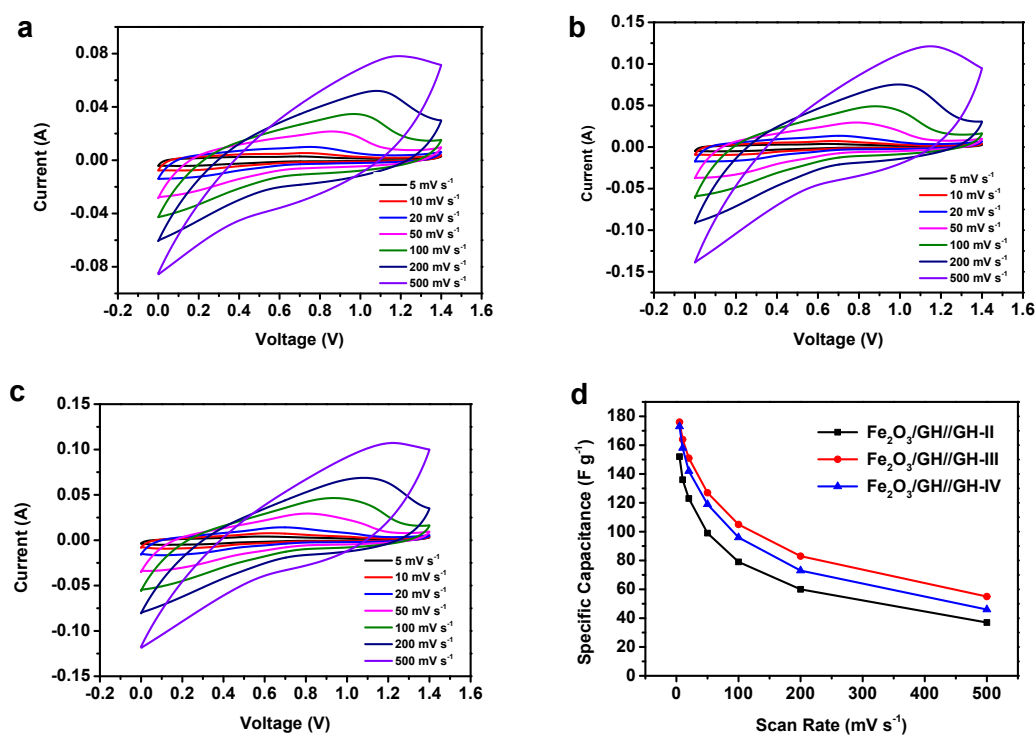

**Figure S4.** CV curves of the  $\text{Fe}_2\text{O}_3/\text{GH}/\text{GH}$ -II (a),  $\text{Fe}_2\text{O}_3/\text{GH}/\text{GH}$ -III (b) and  $\text{Fe}_2\text{O}_3/\text{GH}/\text{GH}$ -IV (c) ASCs as well as the special capacitance of different ASCs corresponding to different scan rates (d).

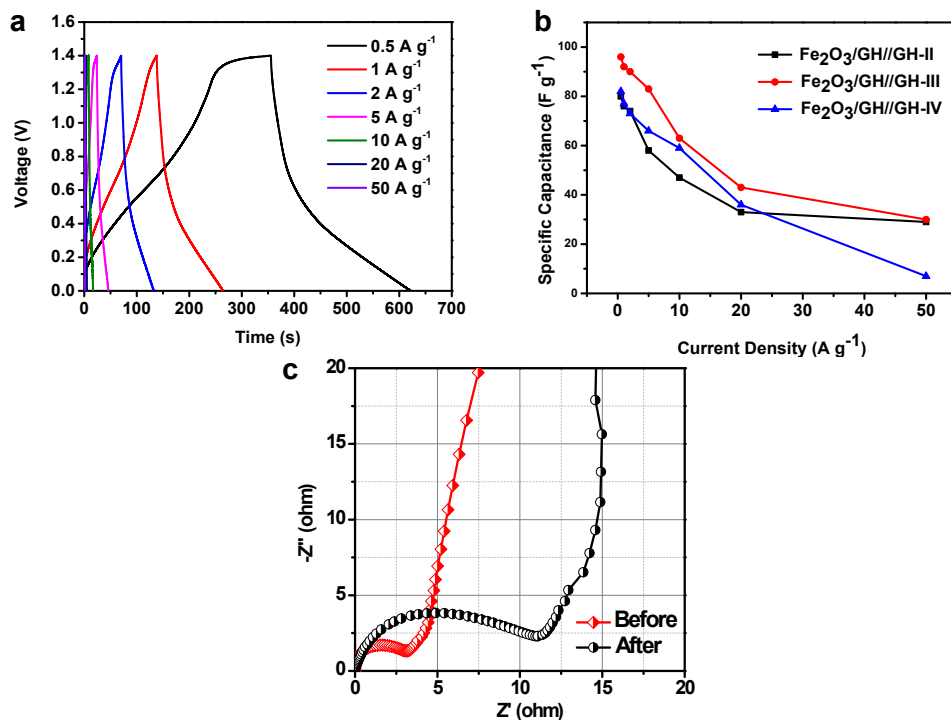

**Figure S5.** Galvanostatic charge-discharge curves (a) of the  $\text{Fe}_2\text{O}_3/\text{GH}/\text{GH-III}$  ASC at different current densities (0-1.4 V) and the special capacitance of the  $\text{Fe}_2\text{O}_3/\text{GH}/\text{GH-III}$  ASC tested at current density of 5  $\text{A g}^{-1}$  (b) as well as the EIS analyses (c) of the  $\text{Fe}_2\text{O}_3/\text{GH}/\text{GH-III}$  ASC before and after 5000 cycles test.

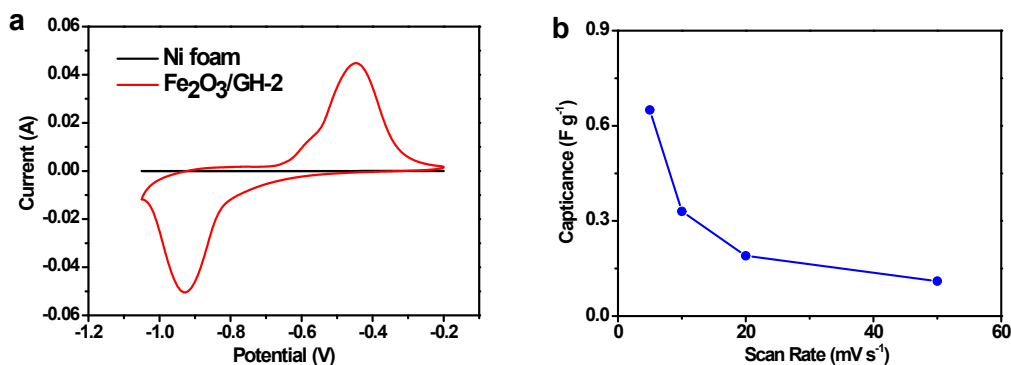

**Figure S6.** The CV curves (a) of Ni foam loaded with (red) and without (black) active material  $\text{Fe}_2\text{O}_3/\text{GH-2}$  at 20  $\text{mV s}^{-1}$  as well as the specific capacitance (b) of Ni foam without active material calculated by CV test. The specific capacitance for Ni foam with the same treatment was 0.065  $\text{F g}^{-1}$  at 5  $\text{mV s}^{-1}$ , while the value was 2310  $\text{F g}^{-1}$  for the sample-loaded electrode. Considering the different mass of Ni substrate (about 72 mg) and  $\text{Fe}_2\text{O}_3/\text{GH-2}$  sample (about 1 mg), the capacitance values came to 4.7 mF and 2310 mF, respectively. It is obvious that the effect of Ni foam on capacitance is negligible.
